# Supplementary material for: Bridging the distributional gap of Tylorida striata (Thorell, 1877) and new synonymy (Araneae: Tetragnathidae)
Source: Biodivers Data J. 2015 Mar 26;(3):e4878. doi: 10.3897/BDJ.3.e4878 (PMC4385902; doi:10.3897/BDJ.3.e4878)
Supplement: Supplementary material 1 — Female length of Tylorida striata per taxonomic reference, examined syntypes and specimens from India [file biodiversity_data_journal-3-e4878-s001.xlsx]

## Sheet: Sheet1
Reference/ Specimen	Female size in mm
Syntype #1 (examined by SK)	5.36
Syntype #2 (examined by SK)	5.34
Tanikawa, A. (2005)	3.27-3.92
Hasselt, A. W. M. van (1882)	5
Zhu, M. S., Wu, C. & Song, D. X. (2002)	4-5
Workman, T. & Workman, M. E. (1894)	5.5
Thorell, T. (1877)	5.5
Bösenberg, W. & Strand, E. (1906)	3.6
Tanikawa, A. (2007)	3.5-4.5
Hu, J. L. (2001)	3.8
Álvarez-Padilla, F. & Hormiga, G. (2011)	10
Thorell, T. (1887)	4.75
BNHS Sp. 139	4.64
BNHS Sp. 140	4.9
BNHS Sp. 141	5.2
BNHS Sp. 142	5.3
BNHS Sp. 143	4.6
BNHS Sp. 144	5
BNHS Sp. 154	4.2
BNHS Sp. 155	4.8
BNHS Sp. 156	4.6
BNHS Sp. 157	5.1
